# Supplementary material for: Influence of Roasting Temperatures on the Antioxidant Properties, β-Glucan Content, and Volatile Flavor Profiles of Shiitake Mushroom
Source: PubMed Central journal article supplement (PMC7824100; doi:10.3390/foods10010054), 2020-12-28
Supplement: foods-10-00054-s001.pdf [file foods-10-00054-s001.pdf]

Supplementary table 1. Correlation matrix among instrumental flavor analysis, antioxidant acti

| Variables                 | Carbon disulfide | Isobutyraldehyde | Benzene       | 3-methyl butanal |
|---------------------------|------------------|------------------|---------------|------------------|
| Carbon disulfide          | <b>1</b>         | 0.016            | <b>0.500</b>  | <b>0.586</b>     |
| Isobutyraldehyde          |                  | <b>1</b>         | <b>-0.508</b> | <b>0.590</b>     |
| Benzene                   |                  |                  | <b>1</b>      | <b>0.228</b>     |
| 3-methyl butanal          |                  |                  |               | <b>1</b>         |
| Thiophene                 |                  |                  |               |                  |
| 2-methyl butanal          |                  |                  |               |                  |
| 2-methyl-2-butenal        |                  |                  |               |                  |
| 2-pentanol                |                  |                  |               |                  |
| Pentanal                  |                  |                  |               |                  |
| Dimethyl disulfide        |                  |                  |               |                  |
| 3-methyl 1-butanol        |                  |                  |               |                  |
| 2-Methyl pentanal         |                  |                  |               |                  |
| 2-methyl 1-butanol        |                  |                  |               |                  |
| Pyridine                  |                  |                  |               |                  |
| Methyl benzene            |                  |                  |               |                  |
| Isoamyl phenyl acetate    |                  |                  |               |                  |
| 2-Methylthiophene         |                  |                  |               |                  |
| 1-Pentanol                |                  |                  |               |                  |
| Hexanal                   |                  |                  |               |                  |
| 2-methyl pyrazine         |                  |                  |               |                  |
| 1,3,5,7-Cyclooctatetraene |                  |                  |               |                  |
| 2-Heptanone               |                  |                  |               |                  |
| 2,5-dimethyl-Pyrazine     |                  |                  |               |                  |
| 2-Pentyl furan            |                  |                  |               |                  |
| Benzaldehyde              |                  |                  |               |                  |
| 2,3,5-trimethyl pyrazine  |                  |                  |               |                  |
| DPPH                      |                  |                  |               |                  |
| Total phenol (Free)       |                  |                  |               |                  |
| Total phenol (Bound)      |                  |                  |               |                  |
| Polyphenol                |                  |                  |               |                  |
| TEAC (Free)               |                  |                  |               |                  |
| TEAC (Bound)              |                  |                  |               |                  |
| Total glucan              |                  |                  |               |                  |
| α- glucan                 |                  |                  |               |                  |
| β- glucan                 |                  |                  |               |                  |

α=0.05

bold text=significant

ivities, and functional activity (glucan contents) results

| Thiophene    | 2-methyl butanal | 2-methyl-2-<br>butenal | 2-pentanol    | Pentanal      | Dimethyl disulfide |
|--------------|------------------|------------------------|---------------|---------------|--------------------|
| <b>0.035</b> | <b>-0.302</b>    | <b>0.663</b>           | <b>-0.910</b> | <b>-0.575</b> | <b>-0.575</b>      |
| <b>0.361</b> | <b>0.343</b>     | <b>0.382</b>           | <b>0.054</b>  | <b>-0.131</b> | <b>-0.131</b>      |
| <b>0.076</b> | <b>-0.630</b>    | <b>-0.279</b>          | <b>-0.736</b> | <b>-0.620</b> | <b>-0.620</b>      |
| <b>0.553</b> | <b>-0.055</b>    | <b>0.423</b>           | <b>-0.620</b> | <b>-0.789</b> | <b>-0.789</b>      |
| <b>1</b>     | <b>-0.534</b>    | <b>-0.210</b>          | <b>-0.292</b> | <b>-0.160</b> | <b>-0.160</b>      |
|              | <b>1</b>         | <b>0.378</b>           | <b>0.606</b>  | 0.015         | 0.015              |
|              |                  | <b>1</b>               | <b>-0.316</b> | <b>-0.200</b> | <b>-0.200</b>      |
|              |                  |                        | <b>1</b>      | <b>0.641</b>  | <b>0.641</b>       |
|              |                  |                        |               | <b>1</b>      | <b>1.000</b>       |
|              |                  |                        |               |               | <b>1</b>           |

| 3-methyl 1-butanol | 2-Methyl pentanal | 2-methyl 1-butanol | Pyridine | Methyl benzene | Isoamyl phenyl acetate |
|--------------------|-------------------|--------------------|----------|----------------|------------------------|
| 0.607              | -0.867            | 0.701              | -0.575   | -0.615         | 0.252                  |
| -0.584             | -0.011            | -0.547             | -0.131   | 0.085          | -0.923                 |
| 0.824              | -0.760            | 0.766              | -0.620   | -0.291         | 0.657                  |
| -0.043             | -0.742            | 0.016              | -0.789   | -0.620         | -0.246                 |
| -0.427             | -0.269            | -0.450             | -0.160   | -0.410         | -0.210                 |
| -0.380             | 0.438             | -0.314             | 0.015    | 0.187          | -0.365                 |
| 0.041              | -0.301            | 0.200              | -0.200   | -0.430         | -0.200                 |
| -0.643             | 0.957             | -0.678             | 0.641    | 0.578          | -0.316                 |
| -0.407             | 0.837             | -0.429             | 1.000    | 0.546          | -0.200                 |
| -0.407             | 0.837             | -0.429             | 1.000    | 0.546          | -0.200                 |
| 1                  | -0.613            | 0.985              | -0.407   | -0.097         | 0.645                  |
|                    | 1                 | -0.646             | 0.837    | 0.620          | -0.301                 |
|                    |                   | 1                  | -0.429   | -0.201         | 0.642                  |
|                    |                   |                    | 1        | 0.546          | -0.200                 |
|                    |                   |                    |          | 1              | -0.430                 |
|                    |                   |                    |          |                | 1                      |

| 2-Methyl<br>thiophene | 1-Pentanol | Hexanal | 2-methyl pyrazine | 1,3,5,7-<br>Cyclooctatetraen<br>e | 2-Heptanone |
|-----------------------|------------|---------|-------------------|-----------------------------------|-------------|
| -0.575                | -0.575     | -0.317  | -0.575            | 0.049                             | -0.575      |
| -0.131                | -0.131     | -0.787  | -0.131            | -0.696                            | -0.131      |
| -0.620                | -0.620     | -0.093  | -0.620            | 0.535                             | -0.620      |
| -0.789                | -0.789     | -0.730  | -0.789            | -0.321                            | -0.789      |
| -0.160                | -0.160     | -0.509  | -0.160            | -0.693                            | -0.160      |
| 0.015                 | 0.015      | 0.178   | 0.015             | 0.163                             | 0.015       |
| -0.200                | -0.200     | -0.162  | -0.200            | -0.194                            | -0.200      |
| 0.641                 | 0.641      | 0.437   | 0.641             | -0.027                            | 0.641       |
| 1.000                 | 1.000      | 0.423   | 1.000             | -0.320                            | 1.000       |
| 1.000                 | 1.000      | 0.423   | 1.000             | -0.320                            | 1.000       |
| -0.407                | -0.407     | 0.106   | -0.407            | 0.695                             | -0.407      |
| 0.837                 | 0.837      | 0.472   | 0.837             | -0.141                            | 0.837       |
| -0.429                | -0.429     | 0.122   | -0.429            | 0.665                             | -0.429      |
| 1.000                 | 1.000      | 0.423   | 1.000             | -0.320                            | 1.000       |
| 0.546                 | 0.546      | -0.023  | 0.546             | 0.059                             | 0.546       |
| -0.200                | -0.200     | 0.657   | -0.200            | 0.691                             | -0.200      |
| 1                     | 1.000      | 0.423   | 1.000             | -0.320                            | 1.000       |
|                       | 1          | 0.423   | 1.000             | -0.320                            | 1.000       |
|                       |            | 1       | 0.423             | 0.527                             | 0.423       |
|                       |            |         | 1                 | -0.320                            | 1.000       |
|                       |            |         |                   | 1                                 | -0.320      |
|                       |            |         |                   |                                   | 1           |

| 2,5-dimethyl-<br>Pyrazine | 2-Pentyl furan | Benzaldehyde | 2,3,5-trimethyl<br>pyrazine | DPPH   | Total phenol<br>(Free) |
|---------------------------|----------------|--------------|-----------------------------|--------|------------------------|
| -0.575                    | -0.575         | -0.575       | -0.575                      | -0.393 | -0.842                 |
| -0.131                    | -0.131         | -0.131       | -0.131                      | 0.835  | 0.242                  |
| -0.620                    | -0.620         | -0.620       | -0.620                      | -0.616 | -0.841                 |
| -0.789                    | -0.789         | -0.789       | -0.789                      | 0.097  | -0.392                 |
| -0.160                    | -0.160         | -0.160       | -0.160                      | 0.133  | -0.073                 |
| 0.015                     | 0.015          | 0.015        | 0.015                       | 0.348  | 0.636                  |
| -0.200                    | -0.200         | -0.200       | -0.200                      | 0.021  | -0.177                 |
| 0.641                     | 0.641          | 0.641        | 0.641                       | 0.414  | 0.949                  |
| 1.000                     | 1.000          | 1.000        | 1.000                       | 0.268  | 0.560                  |
| 1.000                     | 1.000          | 1.000        | 1.000                       | 0.268  | 0.560                  |
| -0.407                    | -0.407         | -0.407       | -0.407                      | -0.604 | -0.833                 |
| 0.837                     | 0.837          | 0.837        | 0.837                       | 0.397  | 0.889                  |
| -0.429                    | -0.429         | -0.429       | -0.429                      | -0.634 | -0.838                 |
| 1.000                     | 1.000          | 1.000        | 1.000                       | 0.268  | 0.560                  |
| 0.546                     | 0.546          | 0.546        | 0.546                       | 0.604  | 0.365                  |
| -0.200                    | -0.200         | -0.200       | -0.200                      | -0.976 | -0.423                 |
| 1.000                     | 1.000          | 1.000        | 1.000                       | 0.268  | 0.560                  |
| 1.000                     | 1.000          | 1.000        | 1.000                       | 0.268  | 0.560                  |
| 0.423                     | 0.423          | 0.423        | 0.423                       | -0.604 | 0.319                  |
| 1.000                     | 1.000          | 1.000        | 1.000                       | 0.268  | 0.560                  |
| -0.320                    | -0.320         | -0.320       | -0.320                      | -0.589 | -0.242                 |
| 1.000                     | 1.000          | 1.000        | 1.000                       | 0.268  | 0.560                  |
| 1                         | 1.000          | 1.000        | 1.000                       | 0.268  | 0.560                  |
|                           | 1              | 1.000        | 1.000                       | 0.268  | 0.560                  |
|                           |                | 1            | 1.000                       | 0.268  | 0.560                  |
|                           |                |              | 1                           | 0.268  | 0.560                  |
|                           |                |              |                             | 1      | 0.462                  |
|                           |                |              |                             |        | 1                      |

| Total phenol (Bound) | Polyphenol | TEAC (Free) | TEAC (Bound) | Total glucan | α- glucan |
|----------------------|------------|-------------|--------------|--------------|-----------|
| -0.543               | -0.770     | -0.771      | 0.157        | 0.152        | 0.557     |
| -0.670               | 0.350      | 0.135       | 0.744        | 0.273        | 0.156     |
| -0.110               | -0.911     | -0.645      | -0.109       | 0.367        | 0.680     |
| -0.976               | -0.322     | -0.203      | 0.852        | 0.702        | 0.445     |
| -0.666               | -0.034     | 0.243       | 0.399        | 0.914        | 0.053     |
| 0.124                | 0.645      | 0.415       | 0.377        | -0.502       | -0.407    |
| -0.427               | -0.057     | -0.291      | 0.303        | -0.259       | 0.011     |
| 0.585                | 0.908      | 0.778       | -0.143       | -0.446       | -0.713    |
| 0.640                | 0.574      | 0.377       | -0.667       | -0.512       | -0.582    |
| 0.640                | 0.574      | 0.377       | -0.667       | -0.512       | -0.582    |
| 0.171                | -0.880     | -0.850      | -0.369       | -0.186       | 0.636     |
| 0.660                | 0.865      | 0.698       | -0.355       | -0.513       | -0.729    |
| 0.111                | -0.867     | -0.856      | -0.326       | -0.222       | 0.586     |
| 0.640                | 0.574      | 0.377       | -0.667       | -0.512       | -0.582    |
| 0.588                | 0.333      | 0.029       | -0.353       | -0.497       | 0.081     |
| 0.356                | -0.517     | -0.209      | -0.480       | -0.042       | -0.055    |
| 0.640                | 0.574      | 0.377       | -0.667       | -0.512       | -0.582    |
| 0.640                | 0.574      | 0.377       | -0.667       | -0.512       | -0.582    |
| 0.777                | 0.238      | 0.334       | -0.636       | -0.549       | -0.681    |
| 0.640                | 0.574      | 0.377       | -0.667       | -0.512       | -0.582    |
| 0.517                | -0.359     | -0.275      | -0.278       | -0.391       | 0.150     |
| 0.640                | 0.574      | 0.377       | -0.667       | -0.512       | -0.582    |
| 0.640                | 0.574      | 0.377       | -0.667       | -0.512       | -0.582    |
| 0.640                | 0.574      | 0.377       | -0.667       | -0.512       | -0.582    |
| 0.640                | 0.574      | 0.377       | -0.667       | -0.512       | -0.582    |
| 0.640                | 0.574      | 0.377       | -0.667       | -0.512       | -0.582    |
| -0.197               | 0.530      | 0.217       | 0.375        | -0.019       | 0.079     |
| 0.332                | 0.988      | 0.900       | 0.078        | -0.257       | -0.795    |
| 1                    | 0.242      | 0.147       | -0.811       | -0.730       | -0.382    |
|                      | 1          | 0.872       | 0.124        | -0.253       | -0.784    |
|                      |            | 1           | 0.179        | 0.099        | -0.838    |
|                      |            |             | 1            | 0.548        | 0.187     |
|                      |            |             |              | 1            | 0.271     |
|                      |            |             |              |              | 1         |

---

$\beta$ - glucan

---

0.132  
0.269  
0.346  
0.690  
0.922  
-0.495  
-0.264  
-0.424  
-0.492  
-0.492  
-0.211  
-0.490  
-0.246  
-0.492  
-0.502  
-0.040  
-0.492  
-0.492  
-0.529  
-0.492  
-0.401  
-0.492  
-0.492  
-0.492  
-0.492  
-0.492  
-0.021  
-0.231  
-0.721  
-0.227  
0.130  
0.543  
0.999  
0.238
